# Supplementary material
Source: publisher site journal article supplement (http://www.kjim.org/upload/media/kjim-2020-656-suppl3.pdf)
Supplement: Supplementary file 1 [file kjim-2020-656-suppl3.pdf]

**Supplementary Table 3. Results of multivariable regression analysis of ARBs and ACEIs for the mortality within 60 days**

| Variable                                   | No. patients | No. death | HR     | 95% CI        | p value  |
|--------------------------------------------|--------------|-----------|--------|---------------|----------|
| <b>Age, yr</b>                             |              |           |        |               |          |
| 0–64                                       | 111,602      | 634       | 1      |               |          |
| ≥ 65                                       | 67,663       | 12,650    | 27.036 | 24.765–29.516 | < 0.0001 |
| <b>Sex</b>                                 |              |           |        |               |          |
| Male                                       | 90,705       | 7,429     | 1      |               |          |
| Female                                     | 88,560       | 5,855     | 0.862  | 0.832–0.893   | < 0.0001 |
| <b>Comorbidity (upper, no; lower, yes)</b> |              |           |        |               |          |
| <b>Hypertension</b>                        |              |           |        |               |          |
|                                            | 119,536      | 2,884     | 1      |               |          |
|                                            | 59,729       | 10,400    | 1.433  | 1.363–1.507   | < 0.0001 |
| <b>Diabetes mellitus</b>                   |              |           |        |               |          |
|                                            | 137,397      | 6,344     | 1      |               |          |
|                                            | 41,868       | 6,940     | 1.061  | 1.022–1.100   | 0.0017   |
| <b>Coronary artery disease</b>             |              |           |        |               |          |
|                                            | 156,504      | 9,310     | 1      |               |          |
|                                            | 22,761       | 3,974     | 0.982  | 0.943–1.024   | 0.3988   |
| <b>Stroke</b>                              |              |           |        |               |          |
|                                            | 159,465      | 8,983     | 1      |               |          |
|                                            | 19,800       | 4,301     | 1.356  | 1.306–1.408   | < 0.0001 |
| <b>COPD</b>                                |              |           |        |               |          |
|                                            | 134,212      | 7,522     | 1      |               |          |
|                                            | 45,053       | 5,762     | 0.864  | 0.833–0.895   | < 0.0001 |
| <b>Cancer (any)</b>                        |              |           |        |               |          |
|                                            | 166,875      | 10,448    | 1      |               |          |
|                                            | 12,390       | 2,836     | 1.631- | 1.563–1.702   | < 0.0001 |
| <b>Chronic kidney disease</b>              |              |           |        |               |          |
|                                            | 172,876      | 11,850    | 1      |               |          |
|                                            | 6,389        | 1,434     | 1.264  | 1.193–1.338   | < 0.0001 |
| <b>Heart failure</b>                       |              |           |        |               |          |
|                                            | 161,697      | 9,656     | 1      |               |          |
|                                            | 17,568       | 3,628     | 1.281  | 1.228–1.335   | < 0.0001 |
| <b>Medication</b>                          |              |           |        |               |          |
| <b>Non-ACEIs/ARBs</b>                      |              |           |        |               |          |
|                                            | 143,583      | 7,612     | 1      |               |          |
|                                            | 33,626       | 5,243     | 0.853  | 0.820–0.887   | < 0.0001 |
| <b>ACEIs</b>                               |              |           |        |               |          |
|                                            | 2,056        | 429       | 1.089  | 0.986–1.203   | 0.0987   |
| <b>Non-ACEIs/ARBs</b>                      |              |           |        |               |          |
|                                            | 143,583      | 7,612     | 1      |               |          |
|                                            | 35,682       | 5,672     | 0.866  | 0.834–0.900   | < 0.0001 |

Adjusted for age, sex, the history of medication (statins in case of ARBs/ACEIs), the history of comorbidities (hypertension, diabetes mellitus, cancer, COPD, stroke, coronary artery disease, heart failure, and chronic kidney disease, statin use) before the diagnosis of coronavirus disease 2019.

ARB, angiotensin receptor blocker; ACEI, angiotensin-converting enzyme inhibitor; HR, hazard ratio; CI, confidence interval; COPD, chronic obstructive pulmonary disorder.
